# Supplementary material for: Exploring the high pressure behavior of 2D and quasi-3D boron layers in MoB2
Source: Royal Society of Chemistry journal article supplement (doi:10.1039/c4ra09527h), 2014-10-06
Supplement: c4ra09527h1.pdf [file c4ra09527h1.pdf]

## Supporting information

# Exploring the high-pressure behavior of 2D and quasi-3D boron layers in MoB<sub>2</sub>

Qiang Tao,<sup>a</sup> Yanmei Ma,<sup>b</sup> Yan Li,<sup>a</sup> Yanli Chen,<sup>a</sup> Yanming Ma,<sup>a</sup> Tian Cui,<sup>a</sup> Xin Wang<sup>a\*</sup> and Pinwen Zhu<sup>a\*</sup>

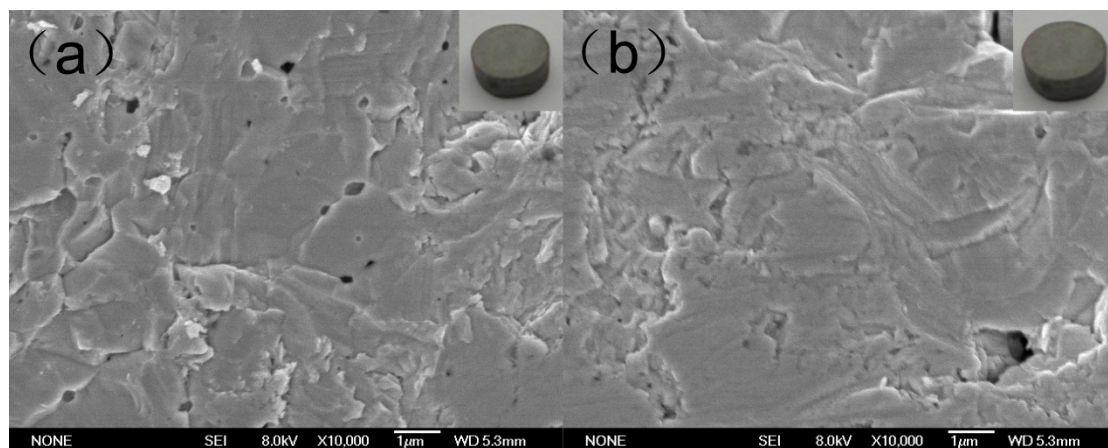

**Fig. S1** (a): SEM of  $\alpha$ -MoB<sub>2</sub>; (b): SEM of  $\beta$ -MoB<sub>2</sub>. The insert patterns in (a) and (b) are samples after high pressure and high temperature experiments, respectively. High pressure makes the samples to be bulk materials, and both the bulk samples and SEM results have no distinct difference.

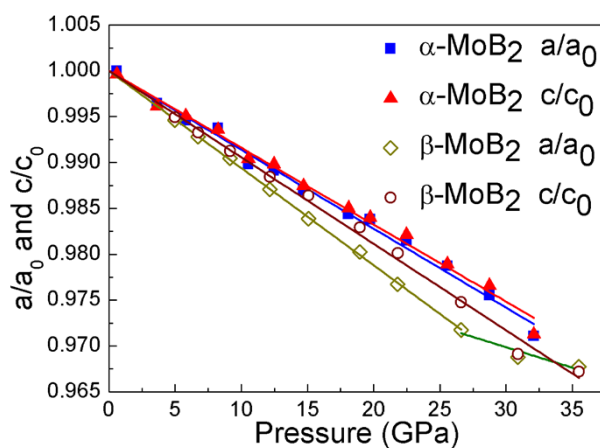

**Fig. S2** MoB<sub>2</sub> fractional lattice parameters plotted as a function of pressure.

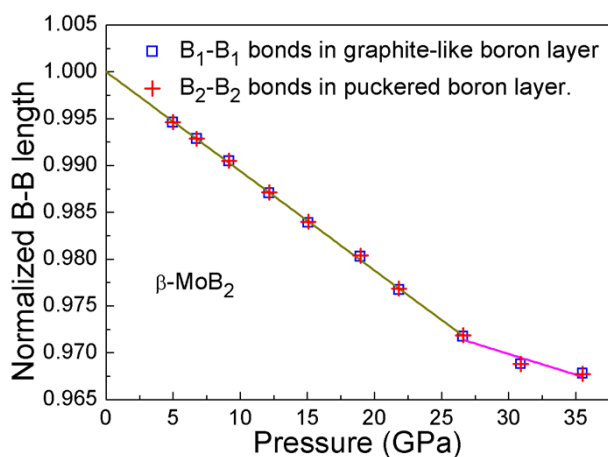

**Fig. S3** Normalized B-B bonds length as a function of pressure in  $\beta$ -MoB<sub>2</sub>. The changed rules of B<sub>1</sub>-B<sub>1</sub> bonds length in graphite-like boron layer are same with B<sub>2</sub>-B<sub>2</sub> bonds length in puckered boron layer.

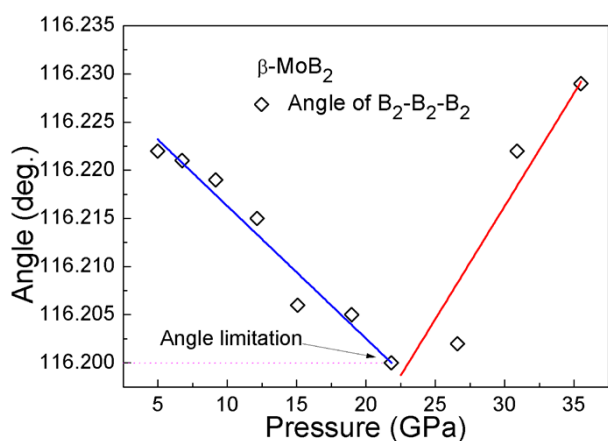

**Fig. S4** Angle of B<sub>2</sub>-B<sub>2</sub>-B<sub>2</sub> as a function of pressure in puckered boron layer of  $\beta$ -MoB<sub>2</sub>.

**Table S1<sup>a</sup>** The Calculated MoB<sub>2</sub> Elastic Constants C<sub>ij</sub>, Bulk Modulus B, Shear Modulus G, Young's Modulus E, calculated Vickers hardness H<sub>v,cal</sub> and experimental Vickers hardness H<sub>v,exp</sub> (in units of GPa).

| Compounds                           | C <sub>11</sub> | C <sub>33</sub> | C <sub>12</sub> | C <sub>13</sub> | C <sub>44</sub> | B   | G   | E   | H <sub>v,cal</sub> | H <sub>v,exp</sub> |
|-------------------------------------|-----------------|-----------------|-----------------|-----------------|-----------------|-----|-----|-----|--------------------|--------------------|
| $\alpha$ -MoB <sub>2</sub> (P6/mmm) | 613             | 391             | 120             | 220             | 168             | 304 | 186 | 463 | 15.9               | 15.2               |
| $\beta$ -MoB <sub>2</sub> (R-3m)    | 550             | 624             | 126             | 180             | 230             | 299 | 216 | 522 | 21.2               | 22.0               |

<sup>a</sup>Reference 1.

1 Q. Tao, X. P. Zhao, Y. L. Chen, J. Li, Q. Li, Y. M. Ma, J. J. Li, T. Cui, P. W. Zhu and X. Wang, *RSC Adv.*, 2013, **3**, 18317.
